# Supplementary material for: Quality of Acute Psychedelic Experience Predicts Therapeutic Efficacy of Psilocybin for Treatment-Resistant Depression
Source: PubMed Central journal article supplement (PMC5776504; doi:10.3389/fphar.2017.00974), 2018-01-17
Supplement: Table1.pdf [file Table1.pdf]

## Supplementary Table S1

### Quality of acute psychedelic experience predicts therapeutic efficacy of psilocybin for treatment-resistant depression

Leor Roseman<sup>1</sup>, David J Nutt<sup>1</sup> & Robin L Carhart-Harris<sup>1</sup>

**\* Correspondence**

Leor Roseman

[leor.roseman13@imperial.ac.uk](mailto:leor.roseman13@imperial.ac.uk)

**Table S1. Correlations between ASC items and clinical outcome in 5 weeks compared to baseline ( $\Delta$ QIDS-SR), ordered by strength.** Due to the exploratory nature of this table, p value are not corrected for multiple comparisons. The colors of the items are based on their 5D-ASC factors: Blue = Oceanic Boundlessness (OBN); Red = Dread of Ego Dissolution (DED); Yellow = Visionary Restructuralization (VRS); Green = Auditory Alternations (AUA); Grey = Vigilance Reduction (VIR).

| ASC                                                                             | Pearson's r | p (2-tail) |
|---------------------------------------------------------------------------------|-------------|------------|
| I felt particularly profound.                                                   | 0.581       | 0.005      |
| I had particularly inventive ideas.                                             | 0.553       | 0.007      |
| I experienced a profound inner peace                                            | 0.541       | 0.008      |
| Worries and fears of everyday life felt irrelevant.                             | 0.526       | 0.010      |
| I felt one with my surroundings.                                                | 0.523       | 0.011      |
| I experienced past, present, and future as a unity.                             | 0.520       | 0.011      |
| Oppositions and contradictions seemed to resolve.                               | 0.499       | 0.015      |
| Many things appeared incredibly funny to me.                                    | 0.477       | 0.019      |
| I felt connected to a higher power.                                             | 0.469       | 0.021      |
| I experienced boundless joy.                                                    | 0.460       | 0.024      |
| I thought I would lastingly change in a wonderful way.                          | 0.445       | 0.028      |
| A voice commented on everything I thought although no one was there.            | 0.443       | 0.029      |
| I felt full of awe.                                                             | 0.409       | 0.041      |
| Body sensations were full of enjoyment.                                         | 0.397       | 0.046      |
| I had insights into the ways the world works that were mysterious to me before. | 0.389       | 0.050      |
| My experience had a religious character.                                        | 0.374       | 0.057      |
| Many things appeared to me as breathtakingly beautiful.                         | 0.372       | 0.058      |
| All things seemed to unify as a whole.                                          | 0.367       | 0.061      |

|                                                                          |        |       |
|--------------------------------------------------------------------------|--------|-------|
| I felt like I was floating.                                              | 0.360  | 0.065 |
| The boundaries between me and my surroundings seemed to vanish.          | 0.350  | 0.071 |
| I felt completely free and detached from all obligations.                | 0.347  | 0.073 |
| I saw colors in complete darkness or with closed eyes.                   | 0.341  | 0.076 |
| I experienced all-embracing love.                                        | 0.329  | 0.084 |
| The world seemed to me beyond good and evil.                             | 0.312  | 0.097 |
| I experienced a glimpse of eternity.                                     | 0.271  | 0.131 |
| I felt like I was in a wonderful other world.                            | 0.260  | 0.141 |
| My sense of time and space was altered as if I was dreaming.             | 0.258  | 0.143 |
| I could see images from my memory or imagination with exceeding clarity. | 0.244  | 0.157 |
| Everything around me seemed to be animated with life.                    | 0.243  | 0.158 |
| Meaningless noises sounded like real words or phrases to me.             | 0.229  | 0.173 |
| I saw brightness or flashes in complete darkness or with closed eyes.    | 0.224  | 0.178 |
| I heard my thoughts as if I had spoken out loud.                         | 0.221  | 0.182 |
| Colors seemed to be altered by sounds or noises.                         | 0.191  | 0.216 |
| My thoughts and actions were slowed down.                                | 0.185  | 0.224 |
| Shapes seemed to be changed by sounds or noises.                         | 0.180  | 0.230 |
| Things came to my mind that I thought long forgotten.                    | 0.173  | 0.239 |
| Sounds seemed to influence what I saw.                                   | 0.171  | 0.242 |
| I saw regular patterns in complete darkness or with closed eyes.         | 0.171  | 0.242 |
| I saw whole scenes in complete darkness or with closed eyes.             | 0.144  | 0.278 |
| I heard full sentences without knowing where they came from.             | 0.133  | 0.294 |
| I felt like a doll on a string or a marionette.                          | 0.105  | 0.334 |
| Everything happened so fast that I could not follow it all.              | 0.099  | 0.343 |
| My imagination was extremely vivid.                                      | 0.099  | 0.344 |
| I felt extraordinary forces within me.                                   | 0.096  | 0.348 |
| I saw things I knew were not real.                                       | 0.094  | 0.351 |
| Things in my surroundings had a new or alien meaning.                    | 0.039  | 0.437 |
| Things in my surroundings appeared smaller or larger.                    | -0.015 | 0.476 |
| I heard rings and tones without knowing where they came from.            | -0.015 | 0.475 |
| I heard music without knowing where it came from.                        | -0.018 | 0.470 |
| I heard buzzing, swooshing, or humming without recognizing the cause.    | -0.034 | 0.444 |
| Some unimportant things acquired special meaning.                        | -0.052 | 0.417 |
| I felt isolated from everything and everyone.                            | -0.062 | 0.400 |

|                                                                                                     |        |       |
|-----------------------------------------------------------------------------------------------------|--------|-------|
| I could remember certain events with exceeding clarity.                                             | -0.064 | 0.398 |
| I heard single words without knowing where they came from.                                          | -0.072 | 0.384 |
| Objects in my surroundings touched me more emotionally.                                             | -0.089 | 0.358 |
| I heard something faintly that I could not identify.                                                | -0.092 | 0.354 |
| I heard voices that did not come from the surroundings as usual.                                    | -0.099 | 0.344 |
| There were sounds in the room that I feel were unlikely to have been real.                          | -0.135 | 0.290 |
| Sounds and noises were less intense than normally.                                                  | -0.135 | 0.290 |
| I had the impression I was out of my body.                                                          | -0.138 | 0.287 |
| From an initially diffuse noise, which I could not identify as real, clear rings and tones evolved. | -0.152 | 0.268 |
| I heard diffuse noises without knowing where they came from.                                        | -0.155 | 0.264 |
| I felt like I do shortly before falling asleep.                                                     | -0.156 | 0.262 |
| I could not get a melody out of my mind.                                                            | -0.157 | 0.261 |
| I had difficulties in distinguishing important from non-important.                                  | -0.185 | 0.224 |
| I felt sleepy.                                                                                      | -0.191 | 0.217 |
| My body seemed numb, lifeless, or alien.                                                            | -0.207 | 0.197 |
| I felt disembodied.                                                                                 | -0.222 | 0.181 |
| I heard a ticking, knocking, ringing, or rattling without being able to recognize the cause.        | -0.228 | 0.174 |
| I felt exhausted.                                                                                   | -0.260 | 0.141 |
| My surroundings appeared strange and eerie.                                                         | -0.267 | 0.135 |
| My perception was hazy                                                                              | -0.274 | 0.128 |
| I felt that I was on the verge of fainting.                                                         | -0.275 | 0.127 |
| I was incapable of making even the slightest decision.                                              | -0.277 | 0.125 |
| I perceived everything blurry, as if through a kind of fog.                                         | -0.296 | 0.110 |
| I had the impression of no longer having my own will.                                               | -0.316 | 0.094 |
| I felt dozy.                                                                                        | -0.323 | 0.089 |
| I thought I was about to fall asleep.                                                               | -0.328 | 0.085 |
| I stayed in a very unnatural pose for an extended period of time.                                   | -0.343 | 0.075 |
| I was afraid of losing control over myself.                                                         | -0.395 | 0.047 |
| I felt dazed.                                                                                       | -0.401 | 0.045 |
| I was afraid of not being able to get out of the state in which I found myself.                     | -0.444 | 0.028 |
| I felt drunk.                                                                                       | -0.467 | 0.022 |
| I felt as if dark forces had overtaken me.                                                          | -0.488 | 0.017 |
| My thoughts were always interrupted; I could not think anything to its end.                         | -0.511 | 0.013 |

|                                                                |        |       |
|----------------------------------------------------------------|--------|-------|
| I was scared without knowing why.                              | -0.519 | 0.011 |
| I felt paralyzed.                                              | -0.529 | 0.010 |
| I experienced everything as frighteningly distorted.           | -0.551 | 0.007 |
| I felt as if I was half-asleep.                                | -0.562 | 0.006 |
| I felt tortured.                                               | -0.576 | 0.005 |
| I had the feeling that something terrible was going to happen. | -0.586 | 0.004 |
| I had the feeling of unbearable emptiness.                     | -0.587 | 0.004 |
| I felt threatened.                                             | -0.607 | 0.003 |
| Time passed slowly in a painful way.                           | -0.616 | 0.002 |
