# Supplementary material for: Quality of Acute Psychedelic Experience Predicts Therapeutic Efficacy of Psilocybin for Treatment-Resistant Depression
Source: PubMed Central journal article supplement (PMC5776504; doi:10.3389/fphar.2017.00974), 2018-01-17
Supplement: Table2.pdf [file Table2.pdf]

## Supplementary Table S2

### Quality of acute psychedelic experience predicts therapeutic efficacy of psilocybin for treatment-resistant depression

Leor Roseman<sup>1</sup>, David J Nutt<sup>1</sup> & Robin L Carhart-Harris<sup>1</sup>

**\* Correspondence**

Leor Roseman

[leor.roseman13@imperial.ac.uk](mailto:leor.roseman13@imperial.ac.uk)

**Table S2. Correlation between PQ items and change of clinical outcome at 5 weeks ( $\Delta$ QIDS), ordered by strength.** The table is provided for descriptive purposes, p values are not corrected for multiple comparisons.

| PQ item                                                | Pearson's r | p (2-tail) |
|--------------------------------------------------------|-------------|------------|
| I felt an inner warmth                                 | 0.616       | 0.002      |
| I felt amazing                                         | 0.591       | 0.004      |
| I felt a profound inner peace                          | 0.540       | 0.008      |
| I felt loved up                                        | 0.517       | 0.012      |
| I felt really sharp                                    | 0.507       | 0.013      |
| I felt energised and enthusiastic about things         | 0.467       | 0.022      |
| My thoughts wandered freely                            | 0.372       | 0.059      |
| I felt like I was floating                             | 0.322       | 0.090      |
| The experience had a spiritual or mystical quality     | 0.259       | 0.142      |
| Sounds influenced things I saw                         | 0.166       | 0.249      |
| I experienced a disintegration of my 'self' or 'ego'   | 0.155       | 0.264      |
| I saw geometric patterns                               | 0.146       | 0.276      |
| I experienced a sense of merging with my surroundings  | 0.110       | 0.327      |
| My imagination was extremely vivid                     | 0.074       | 0.382      |
| Edges appeared warped                                  | 0.025       | 0.459      |
| The experience had a supernatural quality              | -0.020      | 0.468      |
| My perception of time was distorted                    | -0.030      | 0.451      |
| I saw scenes from my past                              | -0.060      | 0.404      |
| How intense were the drug effects when at their peak ? | -0.105      | 0.334      |
| My sense of size and space was distorted               | -0.161      | 0.255      |
| I saw movement in things that weren't really moving    | -0.161      | 0.255      |
| Things looked strange                                  | -0.163      | 0.253      |
| The experience had a dream like quality                | -0.172      | 0.241      |
| I felt unusual bodily sensations                       | -0.276      | 0.127      |
| My thinking was muddled                                | -0.451      | 0.026      |
| I felt entirely normal                                 | -0.460      | 0.024      |
| I feared losing control of my mind                     | -0.513      | 0.012      |
| I felt suspicious and paranoid                         | -0.540      | 0.008      |
| I felt afraid                                          | -0.651      | 0.001      |
